# Supplementary material for: Improved Antiglioblastoma Activity and BBB Permeability by Conjugation of Paclitaxel to a Cell‐Penetrative MMP‐2‐Cleavable Peptide
Source: PubMed Central journal article supplement (PMC7856885; doi:10.1002/advs.202001960), 2020-12-21
Supplement: ADVS-8-2001960-s001.pdf [file ADVS-8-2001960-s001.pdf]

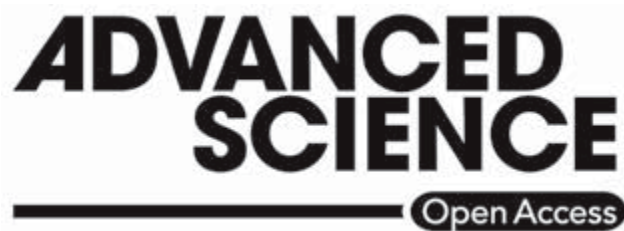

## Supporting Information

for *Adv. Sci.*, DOI: 10.1002/adv.202001960

Improved Anti-glioblastoma Activity and BBB Permeability by Conjugation of Paclitaxel to a Cell-penetrative MMP-2-cleavable Peptide.

*Dan Hua, Lida Tang, Weiting Wang, Shengan Tang, Lin Yu, Xuexia Zhou, Qian Wang, Cuiyun Sun, Cuijuan Shi, Wenjun Luo, Zhendong Jiang, Huining Li, and Shizhu Yu\**

Supporting Information

**Improved Anti-glioblastoma Activity and BBB Permeability by Conjugation of Paclitaxel to a Cell-penetrative MMP-2-cleavable Peptide.**

*Dan Hua, Lida Tang, Weiting Wang, Shengan Tang, Lin Yu, Xuexia Zhou, Qian Wang, Cuiyun Sun, Cuijuan Shi, Wenjun Luo, Zhendong Jiang, Huining Li, and Shizhu Yu\**

**Table S1. Ten PDCs designed in this study.**

| ID | Linker  | CPPs      | PDCs                                                                            |
|----|---------|-----------|---------------------------------------------------------------------------------|
| C1 |         | pVEC      | <b>PTX-2'OH-malonyl-<u>PVGLIG</u>-LLILRRRIRKQAHHSK<sup>a), b), c), d)</sup></b> |
| C2 |         | TP10      | <b>PTX-2'OH-malonyl-<u>PVGLIG</u>-AGYLLGKINLKALAALAKKIL</b>                     |
| C3 | Malonyl | TP10-2    | <b>PTX-2'OH-malonyl-<u>PVGLIG</u>-AGYLLGKINLKPLAALAKKIL</b>                     |
| C4 |         | SynB3     | <b>PTX-2'OH-malonyl-<u>PVGLIG</u>-RRLSYSRRRF</b>                                |
| C5 |         | Tat 47-57 | <b>PTX-2'OH-malonyl-<u>PVGLIG</u>-YGRKKRRQRRR</b>                               |
| N1 |         | pVEC      | <b>LLILRRRIRKQAHHSK-<u>PVGLIG</u>-2'OH-PTX</b>                                  |
| N2 |         | TP10      | <b>AGYLLGKINLKALAALAKKIL-<u>PVGLIG</u>-2'OH-PTX</b>                             |
| N3 | No      | TP10-2    | <b>AGYLLGKINLKPLAALAKKIL-<u>PVGLIG</u>-2'OH-PTX</b>                             |
| N4 |         | SynB3     | <b>RRLSYSRRRF-<u>PVGLIG</u>-2'OH-PTX</b>                                        |
| N5 |         | Tat 47-57 | <b>YGRKKRRQRRR-<u>PVGLIG</u>-2'OH-PTX</b>                                       |

<sup>a)</sup> The nomenclature of PTX-2'OH refers to that 2'-OH group of PTX was used to react with the peptide for forming the PDCs.

<sup>b)</sup> Underlined residues are the sequence of the MMP-2 sensitive peptide.

<sup>c)</sup> The group indicated in red was the linker between PTX and peptide.

<sup>d)</sup> The green amino acids were the CPPs which formed the nanocarrier.

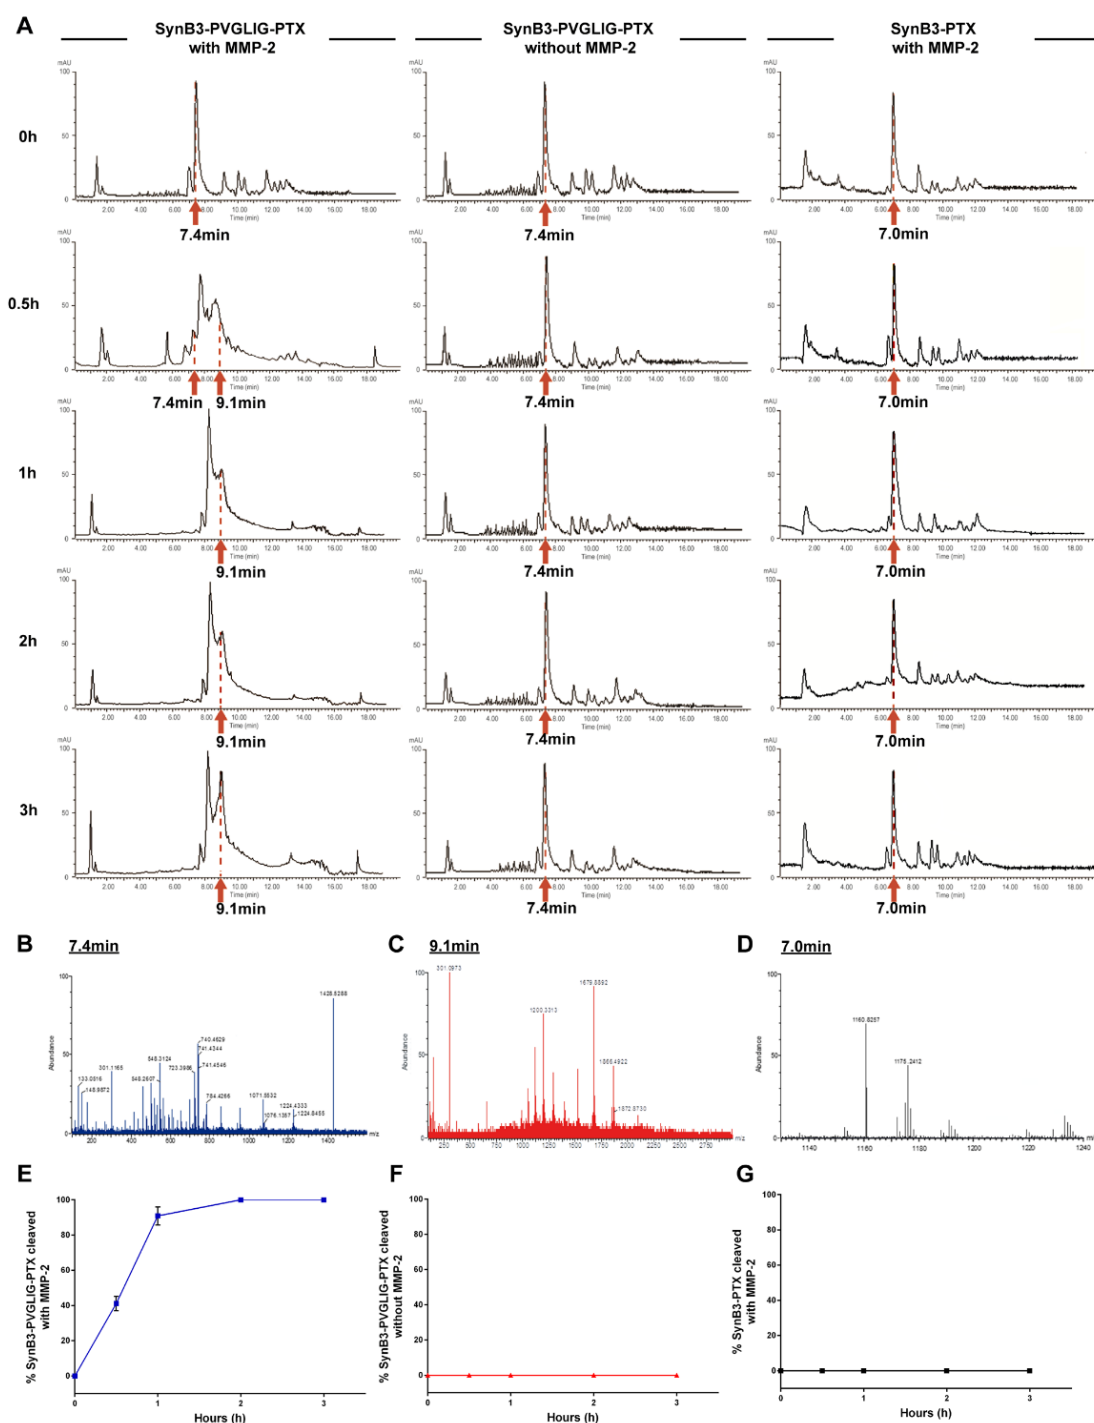

**Figure S1.** The hydrolysis of SynB3-PVGLIG-PTX and SynB3-PTX with or without MMP-2 *in vitro*. (A) Left: HPLC chromatograms of MMP-2 digested SynB3-PVGLIG-PTX after 0.5, 1, 2 and 3 h, observed at 220 nm; retention times  $t_R = 7.4$  and 9.1 min for

SynB3-PVGLIG-PTX and PVG-PTX (thick dotted line) respectively. Middle: HPLC results of SynB3-PVGLIG-PTX without MMP-2 (220 nm);  $t_R = 7.4$  min for SynB3-PVGLIG-PTX. Right: HPLC results (220 nm) after SynB3-PTX was incubated with MMP-2 for 0.5, 1, 2 and 3 h; the retention time  $t_R$  of SynB3-PTX was 7.0 minutes. **(B-D)** The MS results. At 7.4 min, ESIMS  $m/z$  1428.53  $[1/2M+H]^+$ , SynB3-PVGLIG-PTX calcd. At 9.1 min, ESIMS  $m/z$  1200.33  $[M+Na]^+$ , PVG-PTX calcd, and ESIMS  $m/z$  1679.89  $[M+H]^+$ , SynB3-LIG calcd. At 7.0 min, ESIMS  $m/z$  1160.83  $[1/2M+H]^+$ , SynB3-PTX calcd. **(E-F)** The cleavability of SynB3-PVGLIG-PTX (2.5 mg/ml) by MMP-2 was measured by HPLC/MS after it was incubated with 5 ng/ $\mu$ l MMP-2 (blue line and point) or without MMP-2 (red line and triangle) for 0.5, 1, 2, 3 h at 37°C. **(G)**The cleavability of SynB3-PTX (2.5 mg/ml) by 5 ng/ $\mu$ l MMP-2 at 0.5, 1, 2, 3 h at 37°C was measured by HPLC/MS (black line and point).

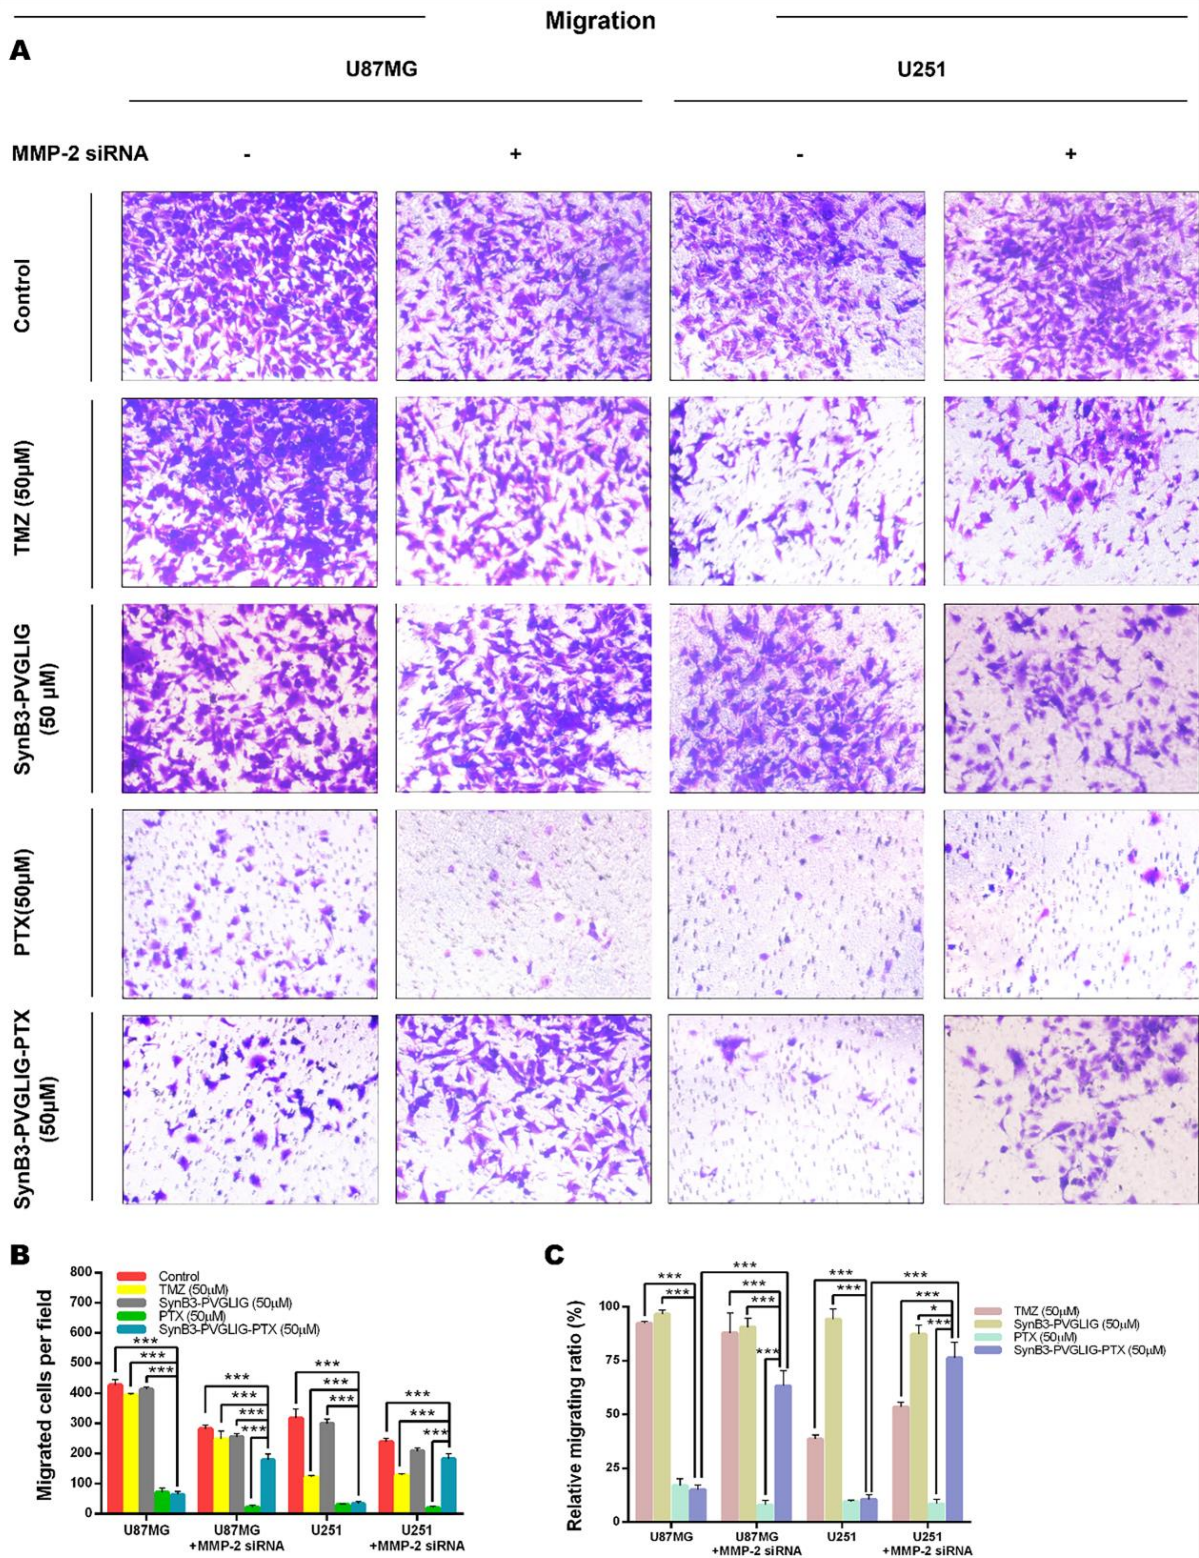

**Figure S2. Effect of SynB3-PVGLIG-PTX on migration of different cell lines by Transwell assay. (A)** The U87MG, MMP-2 siRNA-transfected U87MG, U251, and MMP-2 siRNA-transfected U251 were treated with TMZ, SynB3-PVGLIG, PTX and

SynB3-PVGLIG-PTX at the same dose (50  $\mu\text{M}$ ) for 24 h. Representative images of migrated cells in different groups are shown. The original magnification in this study was  $\times 200$ . **(B)** The number of migrated cells per field. All data are presented as mean  $\pm$  SD,  $n=3$ . Compared with SynB3-PVGLIG-PTX group,  $***P<0.001$  by 2-way ANOVA with Tukey's post-hoc. **(C)** The relative migration rate was presented as a percentage with the value of cells in control group being 100%. All data are expressed as mean  $\pm$  SD,  $n=3$ . Compared with SynB3-PVGLIG-PTX group,  $*P<0.05$ ,  $***P<0.001$  by 2-way ANOVA with Tukey's post-hoc.

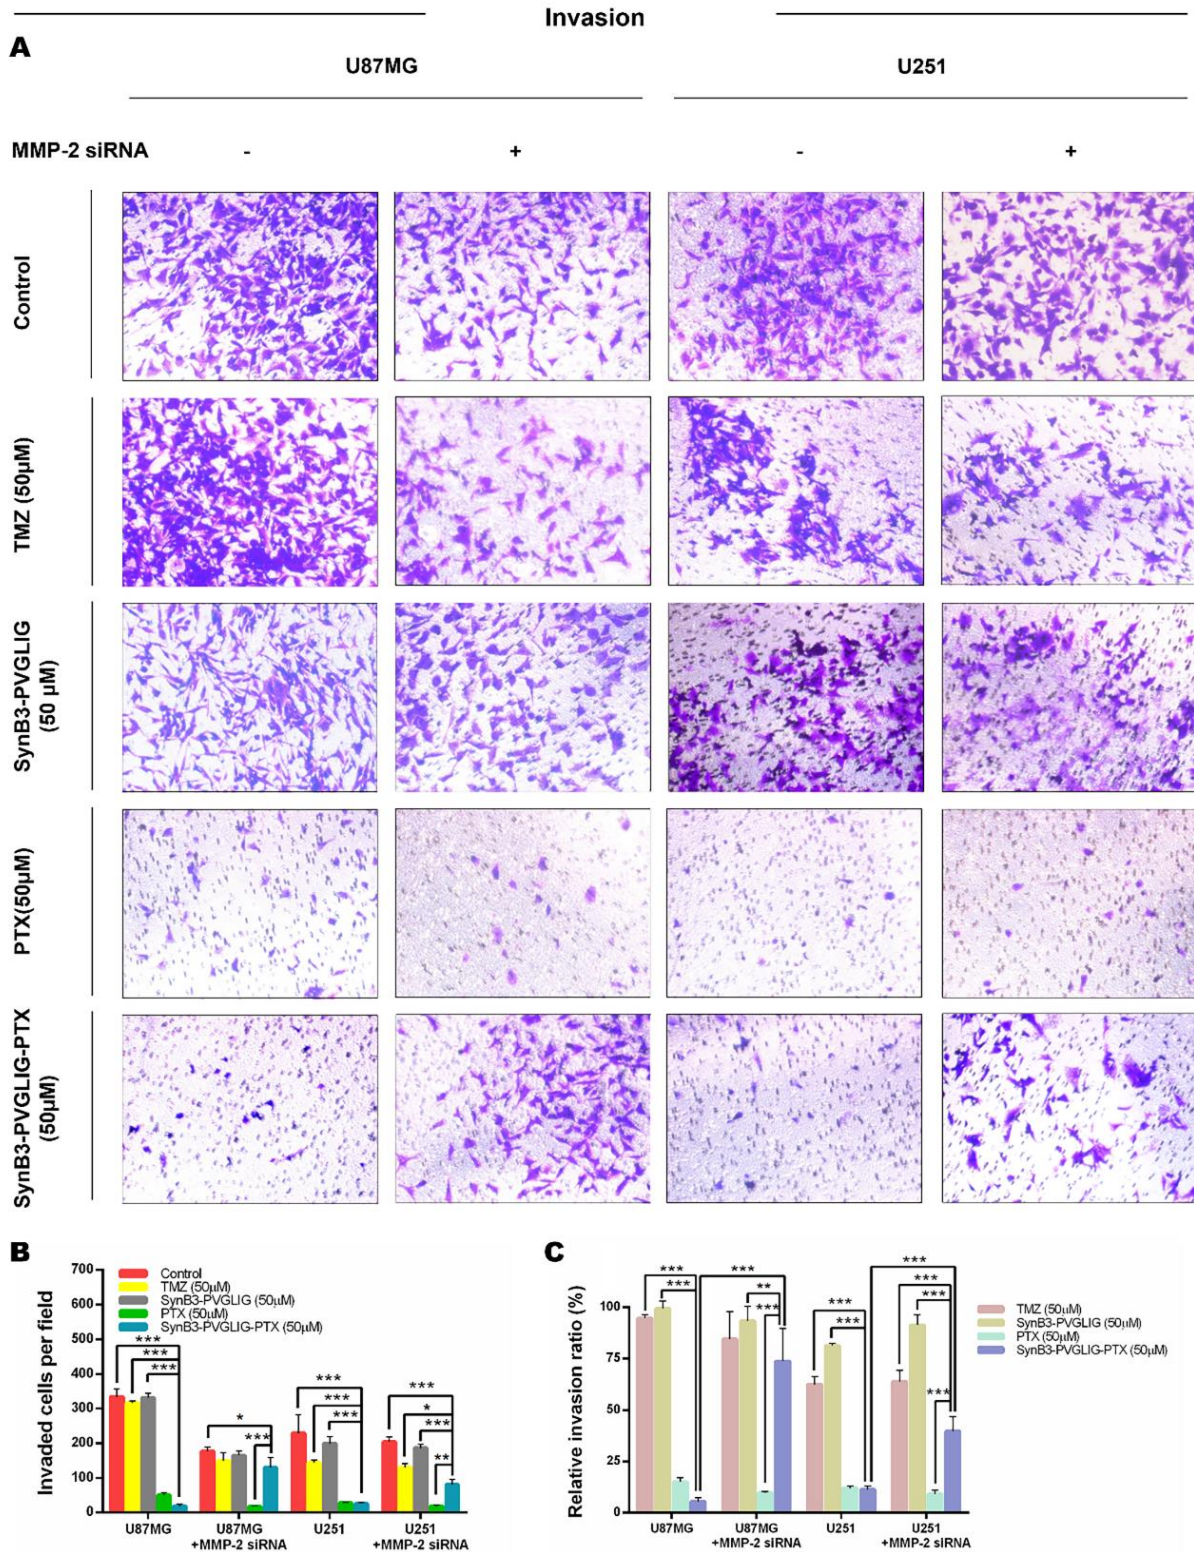

**Figure S3. Effect of SynB3-PVGLIG-PTX on invasion of different cell lines by Transwell assay.** (A) The U87MG, MMP-2 siRNA-transfected U87MG, U251, and MMP-2 siRNA-transfected U251 were treated with TMZ, SynB3-PVGLIG, PTX and



SynB3-PVGLIG-PTX at the same dose (50  $\mu\text{M}$ ) for 24 h. Representative images of invaded cells in different groups are shown. The original magnification in this study was  $\times 200$ . **(B)** The number of invaded cells per field. All data are presented as mean  $\pm$  SD,  $n=3$ . Compared with SynB3-PVGLIG-PTX group,  $*P<0.05$ ,  $**P<0.01$ ,  $***P<0.001$  by 2-way ANOVA with Tukey's post-hoc. **(C)** The relative invasion rate was presented as a percentage with the value of cells in control group being 100%. All data are expressed as mean  $\pm$  SD,  $n=3$ . Compared with SynB3-PVGLIG-PTX group,  $**P<0.01$ ,  $***P<0.001$  by 2-way ANOVA with Tukey's post-hoc.

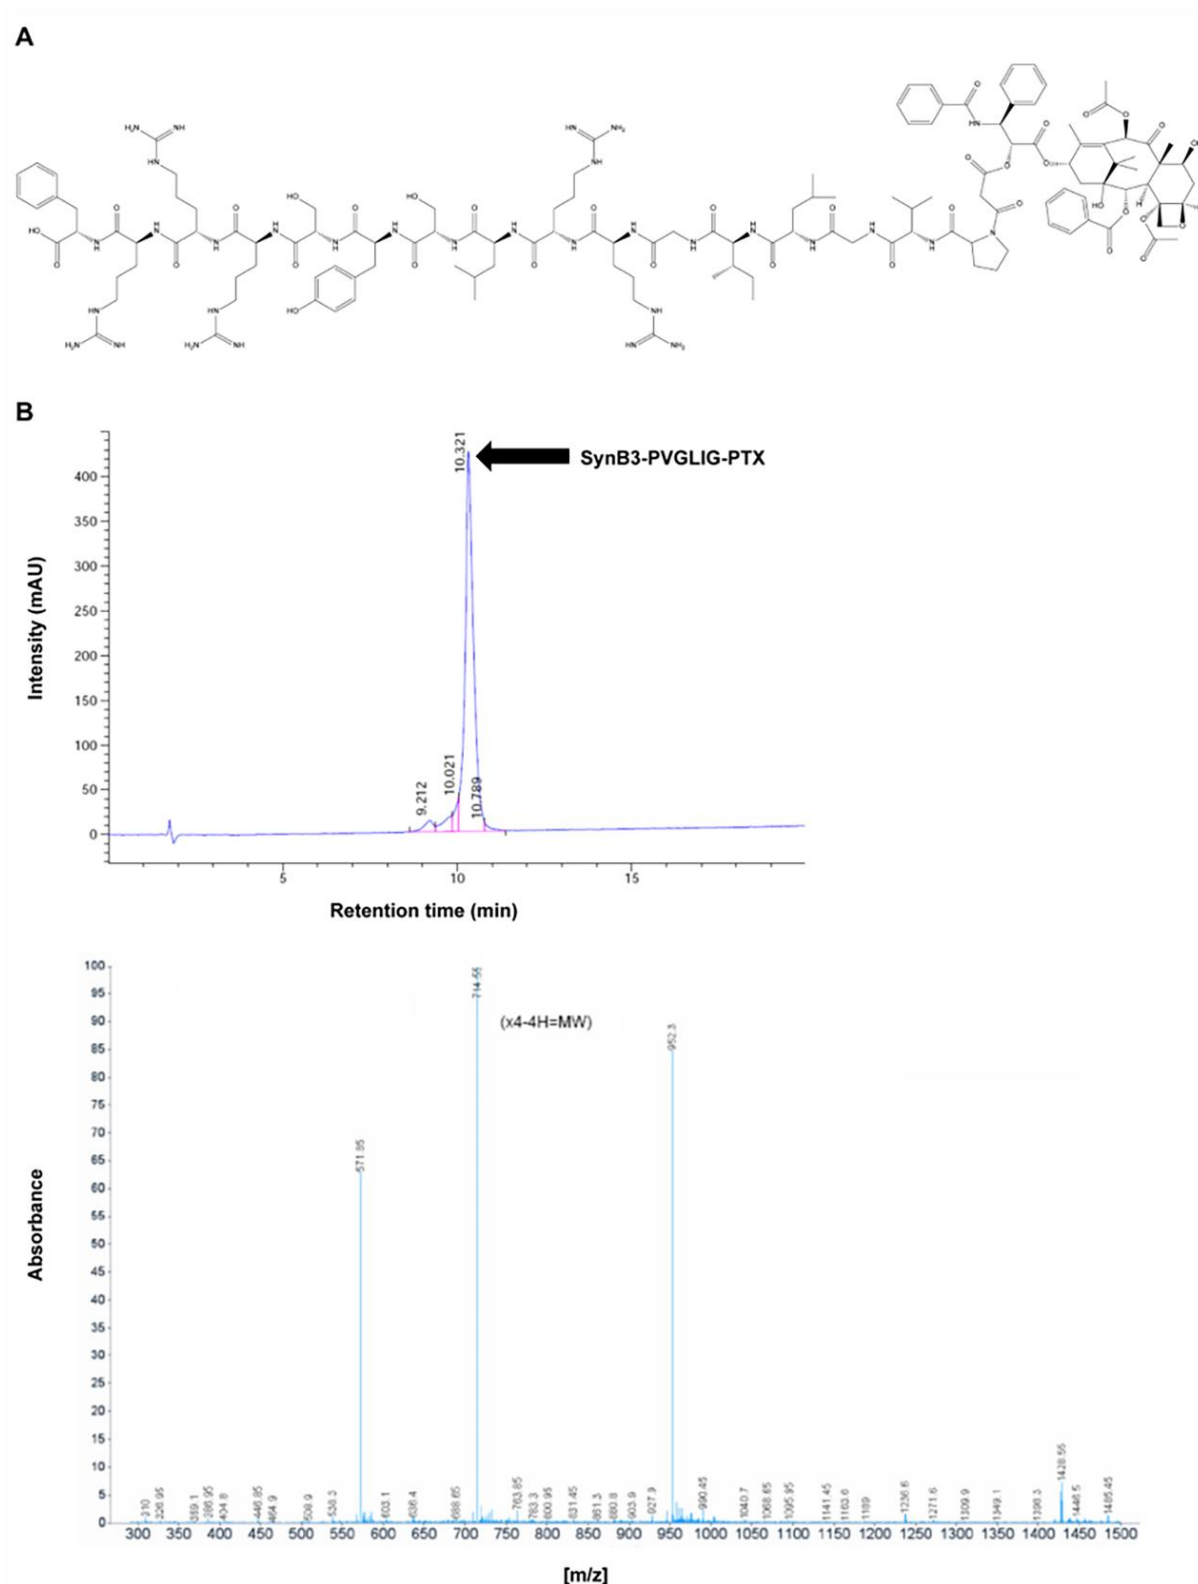

**Figure S4. The identification of SynB3-PVGLIG-PTX.** (A) The structure of SynB3-PVGLIG-PTX. (B) HPLC-MS analysis of synthetic product. SynB3-PVGLIG-PTX, white powder; yield: 87.9% (65 mg). ESI-MS:  $m/z$  714.55 [ $1/4M+H$ ]<sup>+</sup>.

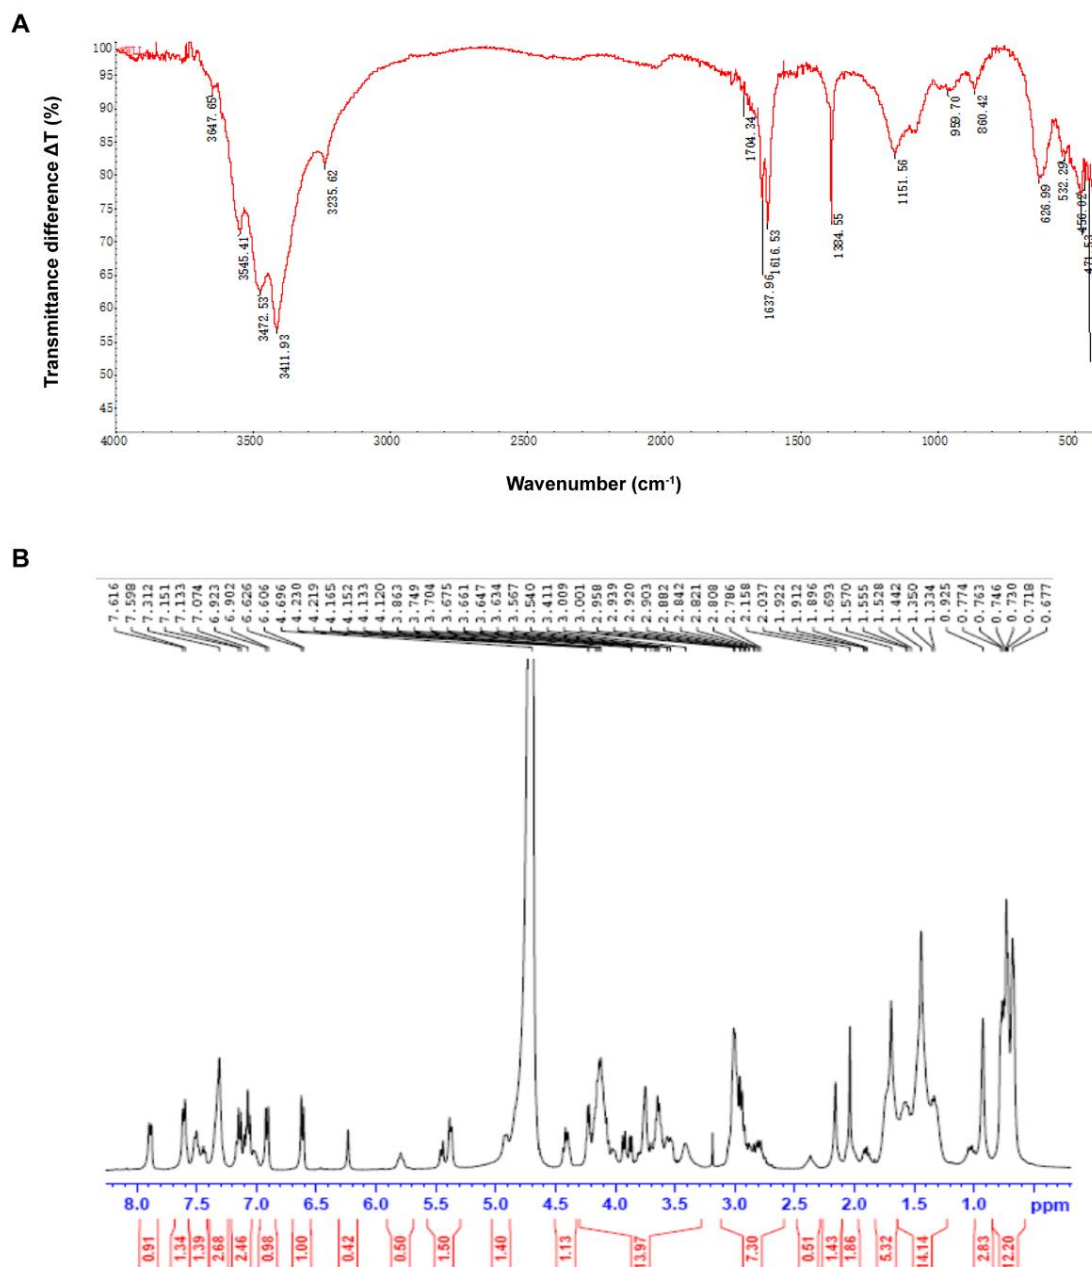

**Figure S5.** IR and  $^1\text{H}$  NMR spectra of SynB3-PVGLIG-PTX. (A) IR (KBr)  $\nu_{\text{max}}$  ( $\text{cm}^{-1}$ ): 3545, 3473, 3412, 3236, 1638, 1617, 1385, 1151. (B)  $^1\text{H}$  NMR (400MHz,  $\text{D}_2\text{O}$ ):  $\delta$  7.90 (d,  $J = 7.2\text{Hz}$ , 2H), 7.60 (d,  $J = 7.2\text{Hz}$ , 2H), 7.45 (m, 4H), 7.31 (m, 6H), 7.15 (m, 2H), 7.07 (m, 4H), 6.91 (d,  $J = 8.2\text{Hz}$ , 2H), 6.61 (d,  $J = 8.2\text{Hz}$ , 2H), 6.24 (br s, 1H), 5.79 (t,  $J = 8.0\text{Hz}$ , 1H), 5.45 (d,  $J = 8.5\text{Hz}$ , 1H), 5.38 (m, 2H), 4.92 (m, 1H), 3.41-4.44 (m, 36H), 2.70-3.01 (m, 17H), 2.37 (m, 1H), 2.16 (s, 3H), 2.04 (s, 3H), 1.89 (m, 2H), 1.69 (s, 3H), 1.33-1.60 (m, 23H), 0.93 (s, 6H), 0.67-0.77 (m, 30H).

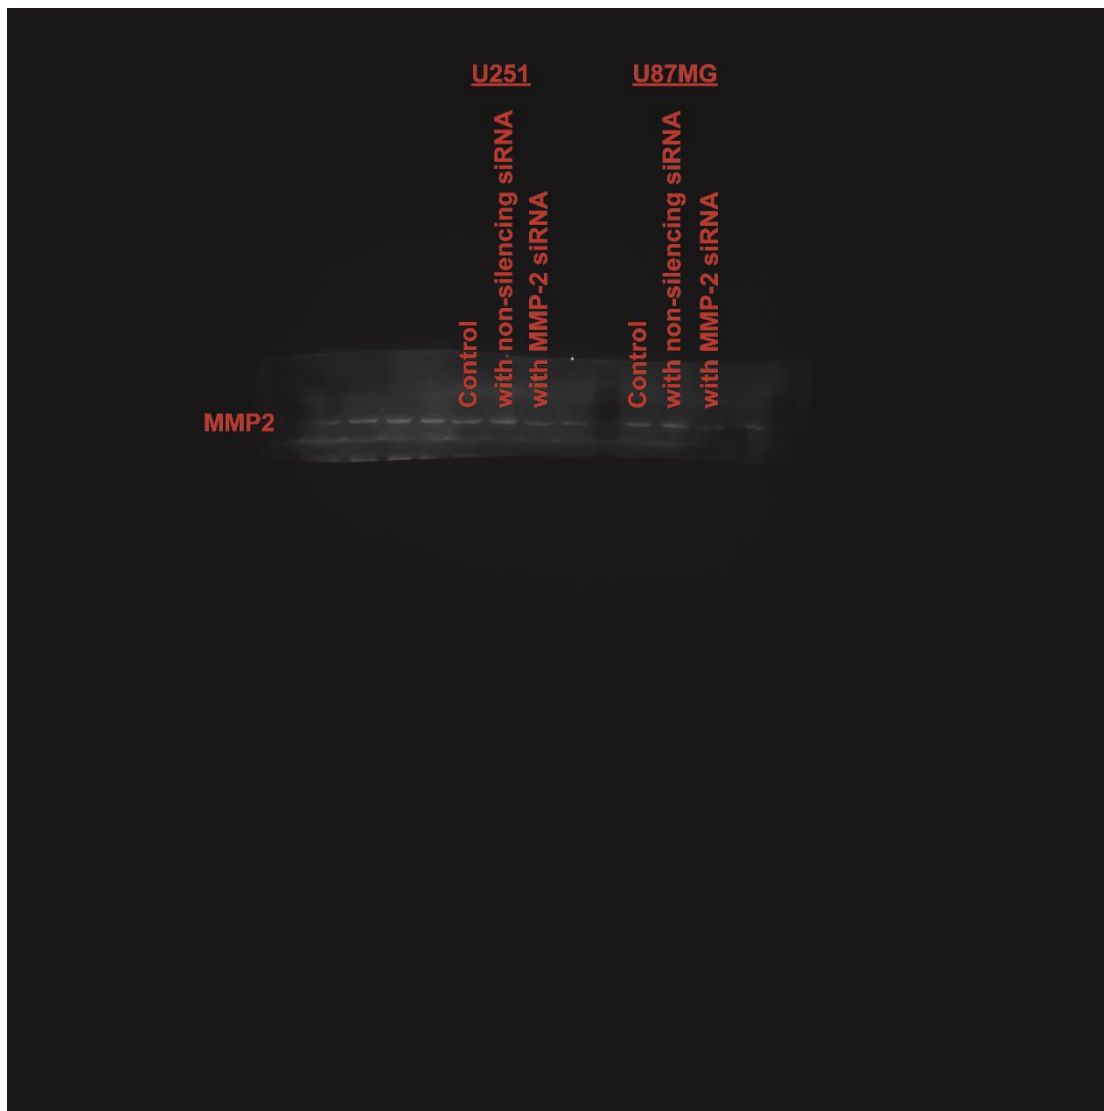

**Figure S6. Original images of western blot with anti-MMP-2 in different protein extracts.**

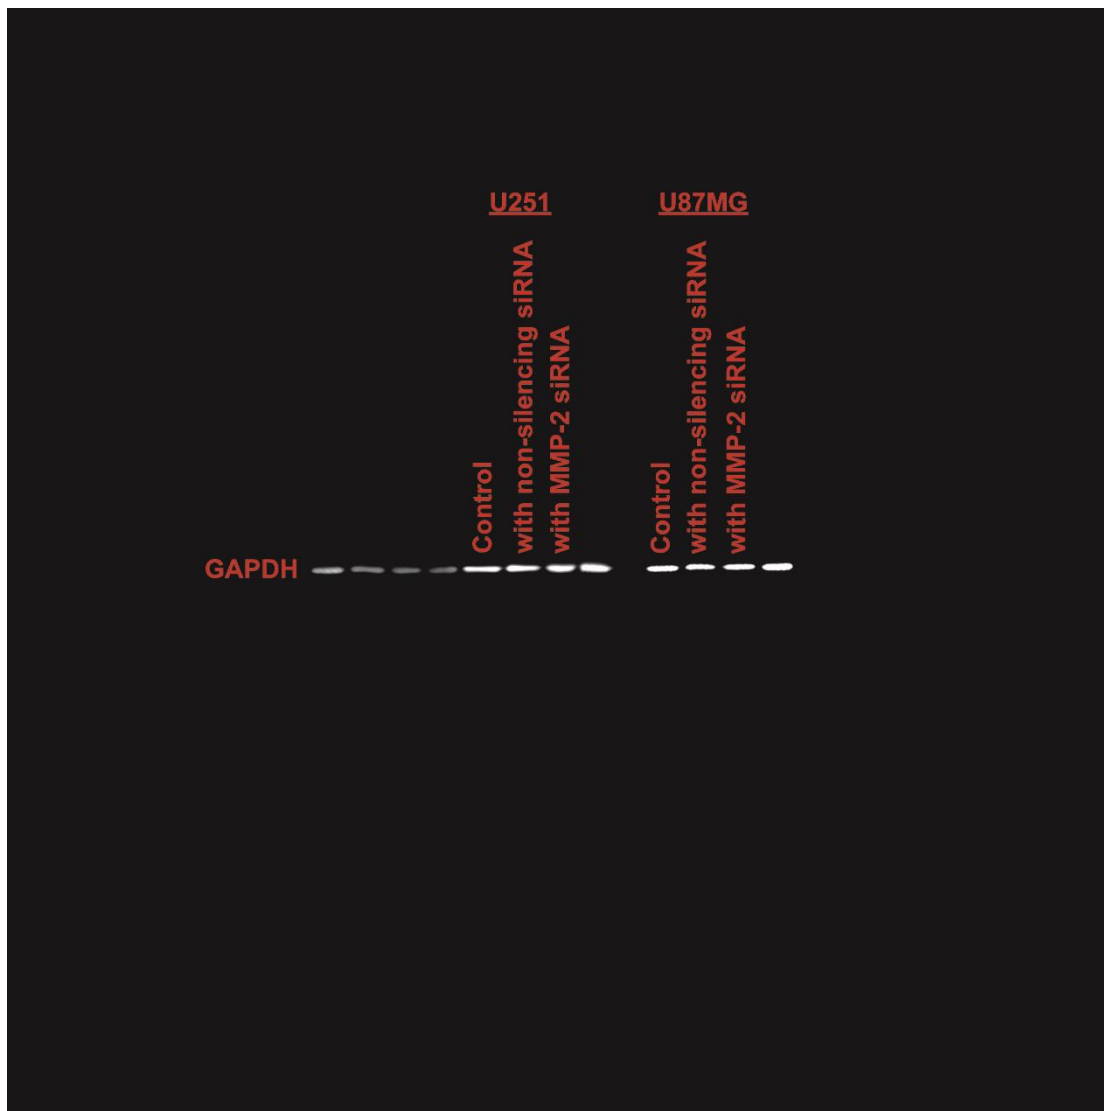

**Figure S7. Original images of western blot with anti-GAPDH in different protein extracts.**
